1 Stabilized Supralinear Network: Model of Layer 2/3 of  
2 the Primary Visual Cortex

3 Dina Obeid<sup>\*1,2</sup> and Kenneth D. Miller<sup>†1,3</sup>

4 <sup>1</sup>Center for Theoretical Neuroscience and Swartz Program in Theoretical  
5 Neuroscience, College of Physicians and Surgeons and Mortimer B.  
6 Zuckerman Mind Brain Behavior Institute, Columbia University, New York  
7 City, NY 10027, USA

8 <sup>2</sup>Harvard John A. Paulson School Of Engineering And Applied Sciences,  
9 Harvard University, Cambridge, MA 02138, USA

10 <sup>3</sup>Department of Neuroscience and Kavli Institute for Brain Science, College  
11 of Physicians and Surgeons and Mortimer B. Zuckerman Mind Brain  
12 Behavior Institute, Columbia University, New York City, NY, USA

13 December 30, 2020

14 **Abstract**

15 Electrophysiological recording in the primary visual cortex (V1) of mammals have  
16 revealed a number of complex interactions between the center and surround. Under-  
17 standing the underlying circuit mechanisms is crucial to understanding fundamental

---

\*dinaobeid@seas.harvard.edu

†ken@neurotheory.columbia.edu

18 brain computations. In this paper we address the following phenomena that have been  
19 observed in V1 of animals with orientation maps: 1) surround suppression that is ac-  
20 companied by a decrease in the excitatory and inhibitory currents that the cell receives  
21 as the stimulus size increases beyond the cell's summation field; 2) surround tuning  
22 to the center orientation, in which the strongest suppression arises when the surround  
23 orientation matches that of the center stimulus; and 3) feature-specific suppression, in  
24 which a surround stimulus of a given orientation specifically suppresses that orienta-  
25 tion's component of the response to a center plaid stimulus. We show that a stabilized  
26 supralinear network that has biologically plausible connectivity and synaptic efficacies  
27 that depend on cortical distance and orientation difference between neurons can con-  
28 sistently reproduce all the above phenomena. We explain the mechanism behind each  
29 result, and argue that feature-specific suppression and surround tuning to the center  
30 orientation are independent phenomena. Specifically, if we remove some aspects of  
31 the connectivity from the model it will still produce feature-specific suppression but  
32 not surround tuning to the center orientation. We also show that in the model the  
33 activity decay time constant is similar to the cortical activity decay time constant re-  
34 ported in mouse V1. Our model indicates that if the surround activates neurons that  
35 fall within the reach of the horizontal projections in V1, the above mentioned phe-  
36 nomena can be generated by V1 alone without the need of cortico-cortical feedback.  
37 Finally, we show that these results hold both in networks with rate-based units and  
38 with conductance-based spiking units. This demonstrates that the stabilized supra-  
39 linear network mechanism can be achieved in the more biological context of spiking  
40 networks.

## 41 **Introduction**

42 Electrophysiological recording from cells in the primary visual cortex (V1) reveal that visual  
43 stimuli presented outside the classical receptive field (CRF) of a neuron (the surround) can  
44 modulate the neuron's response to a stimulus present in its CRF (the center) in complex

45 ways. The degree and direction of modulation depends on the distance between the center  
46 and surround, the contrasts of the stimuli, their relative orientations, etc. (Akasaki et al.,  
47 2002; Bair et al., 2003; Cavanaugh et al., 2002; Sceniak et al., 1999; Shen et al., 2007; Sillito  
48 et al., 1995; Wang et al., 2009). Which of these modulations are carried by V1 lateral  
49 connections, and which require top-down signals from higher visual areas is still largely  
50 unknown. Understanding the underlying circuit mechanisms is crucial to understanding  
51 fundamental brain computations.

52 To address these mechanisms, we build a spatially-extended, biologically-constrained  
53 model of layer 2/3 of V1 of animals with orientation maps. We investigate whether a set  
54 of key phenomena that have been reported in V1 can be consistently generated by lat-  
55 eral connections alone, without the need of cortico-cortical feedback. We find that lateral  
56 connections are sufficient provided that specific conditions for connectivity and synaptic ef-  
57 ficacies are met. Therefore, our model makes testable predictions about the structure of the  
58 underlying circuit.

59 We first address surround suppression. We show that our model can successfully repro-  
60 duce surround suppression in similar strength and with similar contrast dependence to that  
61 observed in layer 2/3 of V1 of animals with orientation maps. Furthermore, this suppression  
62 is accompanied by a decrease in both excitatory and inhibitory conductances that the cell  
63 receives, as reported in Ozeki et al. (2009). In order to achieve this, in addition to structured  
64 connectivity, the network must locally have strong connections. Although many studies have  
65 shown that surround suppression in V1 can be mediated through lateral connections (Ru-  
66 bin et al., 2015), this is the first demonstration of the accompanying decrease in received  
67 inhibition as well as excitation in a spatially extended (spatially two-dimensional) model.

68 We then investigate two new phenomena: (1) The strongest suppression arises when the  
69 surround orientation matches that of the center stimulus, even when the center orientation  
70 is not optimal for the cell (Shushruth et al., 2012; Trott and Born, 2015) and (2) A surround  
71 with orientation matching the orientation of one component of a plaid center stimulus more

72 strongly suppresses the response of the matching component (Trott and Born, 2015). We  
73 show that phenomena (1) and (2) can be generated within V1 if the surround falls with the  
74 reach of V1 lateral connections. We find that to match (1), local connectivity, in addition to  
75 being strong, must be broadly tuned for orientation; however to match (2) this additional  
76 requirement is not needed. This leads us to conclude that effects (1) and (2) are independent.  
77 We further show that in the model the activity decay time constant is fast, similar to  
78 the cortical activity decay time constant reported by Reinhold et al. (2015). Finally, we  
79 show that our results hold in networks with conductance-based spiking units as well as rate  
80 units. This demonstrates that the Stabilized-Supralinear Network mechanism described in  
81 Ahmadian et al. (2013) and Rubin et al. (2015) can arise in the more biological context of a  
82 spiking neural network (see also Sanzeni et al. (2020a,b)).

## 83 **Model**

### 84 **Model Overview**

85 To investigate the computational role of V1 lateral connections, we build a 2-dimensional  
86 spatially extended model of layer 2/3 of the primary visual cortex of animals with orientation  
87 maps. Retinotopic position changes smoothly across both spatial dimensions, while preferred  
88 orientation of neurons is determined by their position in the orientation map. The Cortical  
89 Magnification Factor (CMF), which expresses how many mm of cortex represents one degree  
90 in visual angle, constrains the size of a neuron's receptive field (RF), as we describe below.

91 The connectivity in the model is broadly constrained by biological data. Neurons in V1  
92 layer 2/3 are found to form dense axonal projections at distances of a few hundred  $\mu m$ , and  
93 sparse long range horizontal projections that target cells of similar orientation preferences.  
94 These long range connections, which can reach up to 3  $mm$  in cat and 10  $mm$  in monkey, arise  
95 from excitatory cells, and give rise to the patchy connectivity observed in V1 (Amir et al.,  
96 1993; Bosking et al., 1997; Stettler et al., 2002). In comparison, inhibitory cells primarily

97 form short range connections.

98 We first present results from a rate-based model. The units in the rate-based model  
99 are taken to have an expansive or supralinear, power-law transfer function (Albrecht and  
100 Hamilton, 1982; Albrecht, 1991; Carandini et al., 1997, 1999; Finn et al., 2007; Hansel  
101 and Van Vreeswijk, 2002; Heeger, 1992; Miller and Troyer, 2002), as expected for neurons  
102 whose spiking is driven by input fluctuations rather than by the mean input (Hansel and  
103 Van Vreeswijk, 2002; Miller and Troyer, 2002). Rubin et al. (2015) and Ahmadian et al.  
104 (2013) showed that when neural-like units have such a power-law transfer function, responses  
105 with nonlinear behaviors observed in visual cortex emerge due to network dynamics. The  
106 authors called this mechanism the Stabilized Supralinear Network (SSN). They showed that  
107 the SSN mechanism can explain normalization and surround suppression and their nonlin-  
108 ear dependencies on stimulus contrast, which are observed across multiple sensory cortical  
109 areas.

110 To verify that our results are robust and independent of the neuron model, we also build  
111 a conductance-based spiking neural network model, and show that all our key results still  
112 hold. This shows as well that the SSN mechanism can be realized with spiking neurons.

## 113 Model Details

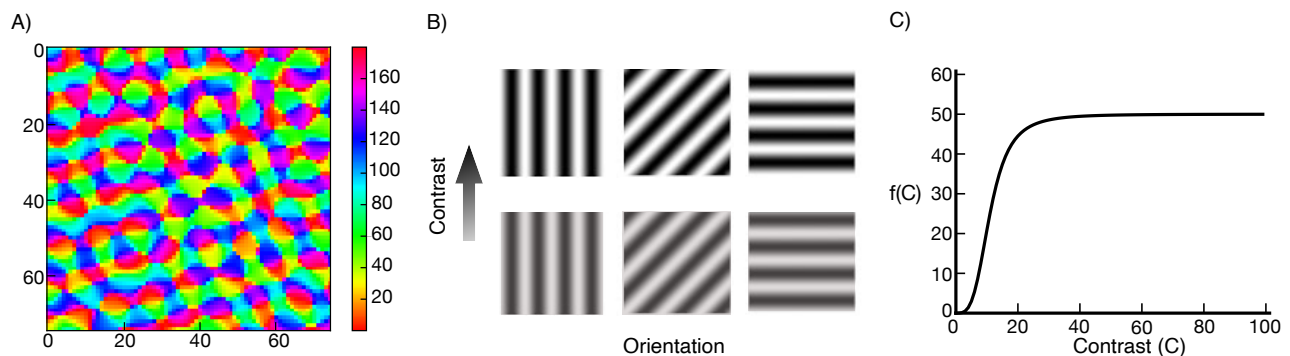

**Figure 1:** (A) Orientation map, the color corresponds to the cells preferred orientation. (B) Gratings with different orientations and contrasts. (C) External input as a function of the stimulus contrast (Eq. 3).

114 We use a grid of 75 x 75 grid points. We place one excitatory cell (E), and one inhibitory  
115 cell (I) at each location on the lattice, and thus have 5625 E cells and 5625 I cells in the  
116 network. Even though we use a 50/50 E/I ratio, we believe that our main results will  
117 not change if we take the E/I ratio to be 80/20. In unpublished work we studied SSN  
118 behavior in spiking networks consisting of 1152 E cells and 288 I cells (E/I ratio of 80/20),  
119 and found that the network behavior was consistent with SSN predictions in the parameter  
120 regime we studied (strongly suppressive regime, *i.e.* with  $\Omega_E < \Omega_I < 0$ , using parameters  
121 defined in Ahmadian et al. (2013)). We take the map to represent 16x16 degrees of visual  
122 space, with position in visual space varying linearly across the map, and assume a Cortical  
123 Magnification Factor (CMF) of 0.5 mm/deg. Thus the grid represents 8.0 x 8.0 mm of  
124 cortex, with each grid interval representing 0.213 degrees and 107  $\mu\text{m}$  of cortical distance.  
125 We use periodic boundary conditions; our results are independent of that condition. This is  
126 verified by removing periodic boundary conditions, and adjusting the weight efficacy matrix  
127 to compensate for the lost connections.

128 We superpose on the grid an orientation map, specifying the preferred orientations of cells  
129 at the corresponding grid points (Fig. 1A). The orientation map is generated randomly using  
130 the method described in Kaschube et al. (2010) (their supplementary materials, Eq. 20). To  
131 summarize, we superpose  $n$  complex plane waves to form a function  $z(\mathbf{x})$  of two-dimensional  
132 spatial position  $\mathbf{x}$ :

133 
$$z(\mathbf{x}) = \sum_{j=1}^n e^{i(l_j \mathbf{k}_j \mathbf{x} + \phi_j)}. \quad (1)$$

134 Here,  $\mathbf{k}_j = k(\cos(j\pi/n), \sin(j\pi/n))$ , with signs  $l_j \in \{+1, -1\}$  and phases  $\phi_j \in [0, 2\pi)$   
135 randomly chosen. Writing  $z(\mathbf{x}) = r(\mathbf{x})e^{i\Phi(\mathbf{x})}$  for real amplitude  $r(\mathbf{x})$  and phase  $\Phi(\mathbf{x})$ , we take  
136 the preferred orientation at each grid point  $\mathbf{x}$  to be  $\Phi(\mathbf{x})/2$ . We use a map spatial frequency  
137 of  $k = \frac{8 \text{ cycles}}{75 \text{ grid points}}$ , *i.e.* a map with on average 8 full periods of the orientation map across  
138 the length or width of the grid, and  $n = 30$ . The orientation map is not periodic, so there is  
139 a discontinuity in orientation at the grid borders, although the retinotopy and intracortical

140 connections wrap around. In our results, we report on cells sampled away from the boundary  
141 ( $20 < x < 60, 20 < y < 60$ , in terms of the grid coordinates that go from 1 to 75 in each  
142 dimension ) to avoid boundary effects.

143 The excitatory cells form long range connections, while the inhibitory cells form short  
144 range connections. The connection strength from a unit of type  $Y$  and grid position  $b$   
145 to a unit of type  $X$  at position  $a$ ,  $X, Y \in \{E, I\}$ , is written  $W_{XY}^{ab}$ . Let the units at  $a$   
146 and  $b$  have positions  $\mathbf{x}_a$  and  $\mathbf{x}_b$ , respectively, and preferred orientations  $\theta_a$  and  $\theta_b$ . The  
147 connection strength is given by  $W_{XY}^{ab} = J_{XY} p_{XY}(|\mathbf{x}_a - \mathbf{x}_b|) q_{XY}(d(\theta_a, \theta_b))$ , where  $d(\theta_a, \theta_b)$  is  
148 the shortest angular distance around a  $180^\circ$  circle between the two orientations. Here,  $p_{XY}(x)$   
149 describes the dependence of strength on the spatial distance between the units (measured  
150 as the shortest distance across the grid with periodic boundary conditions), while  $q_{XY}(\theta)$   
151 describes the dependence on the difference between their preferred orientations measured  
152 as shortest distance around the circle of orientations. The function  $p_{XY}(x)$  is specified  
153 as follows: for projections of excitatory cells,  $p_{XE}(x)$  is 1 for distances  $x \leq L_o$ , and then  
154 decays as a Gaussian with standard deviation  $\sigma_{XE}$ .  $L_o = 324 \mu\text{m}$ ,  $\sigma_{EE} = 324 \mu\text{m}$  and  
155  $\sigma_{IE} = 642 \mu\text{m}$ . For projections of inhibitory cells,  $p_{XI}(x)$  is Gaussian with standard deviation  
156  $\sigma_{EI} = \sigma_{II} = 216 \mu\text{m}$ . For all cells regardless of pre- or postsynaptic type, the function  
157  $q_{XY}(\theta)$  has the form of a Gaussian with a non-zero baseline:  $q_{XY}(\theta) = A_{XY} + B_{XY} e^{\frac{-\theta^2}{2 * (\sigma_{XY}^{ori})^2}}$ .  
158 For projections of I cells and of E cells at distances less than  $L_o$ ,  $A_{XI} = A_{XE} = 0.2$ ,  
159  $B_{XI} = B_{XE} = 0.8$  and  $\sigma_{XI}^{ori} = \sigma_{XE}^{ori} = 55^\circ$ . For projections of excitatory cells at distances  
160 greater than  $L_o$ ,  $A_{XE} = 0.14$ ,  $B_{XE} = 0.86$  and  $\sigma_{XE}^{ori} = 25^\circ$ . The constants  $J_{XY}$  are, for I  
161 projections,  $J_{EI} = 0.0528$  and  $J_{II} = 0.0288$ ; for E projections, at distances less than  $L_o$ ,  
162  $J_{EE} = 0.072$  and  $J_{IE} = 0.06$ , while at distances greater than  $L_o$ ,  $J_{EE} = J_{IE} = 0.036$ . We  
163 point out that the heterogeneity in the network comes from the underlying orientation map.

164 We choose the connectivity parameters so that the connectivity profile agrees with exper-  
165 imental findings. We choose the  $J_{XY}$  such that 1) the network is in a strong sublinear regime  
166 (see Result 1 for more details) and 2) with increasing stimulus size, the loss of excitatory

167 input to inhibitory cells from nearby surround-suppressed excitatory cells is greater than  
168 their gain in excitatory input from far away excitatory cells, which is necessary for the net  
169 inhibition received by excitatory cells to decrease with surround suppression. We constrain  
170 the rest of the model parameters by experimental data to make the model more biologically  
171 plausible.

172 We ignore stimulus features like spatial frequency and phase, and consider only three  
173 features: contrast, orientation and size (Fig. 1B). The cells in the model behave like ideal  
174 complex cells, in that their response to a drifting grating is static in time. Spatially, each  
175 cell has a circularly symmetric Gaussian receptive field with standard deviation  $\sigma_{rf} = 0.09^\circ$ .  
176 The external input to a neuron located at position  $(x_o, y_o)$  with preferred orientation  $\theta_o$ ,  
177 from a stimulus of contrast  $C$  and orientation  $\theta_s$  that is centered at  $(x_s, y_s)$  and is uniform  
178 for a diameter of  $\ell$  degrees about the center (and zero contrast outside), is given by

$$179 \quad f(C) h_\ell(\mathbf{x}_s - \mathbf{x}_o) g(\theta_s - \theta_o). \quad (2)$$

180 Here  $f(C)$  is a Naka-Rushton function given by

$$181 \quad f(C) = \frac{f_{max} * C^{3.5}}{C_{50}^{3.5} + C^{3.5}} \quad (3)$$

182 with  $f_{max} = 50$  and  $C_{50} = 11$  (Fig. 1C).  $h_\ell(\mathbf{x})$  is the integral of the product of the Gaussian  
183 classical receptive field with a sharp edge stimulus. It is given by:

$$184 \quad h_\ell(\mathbf{x}_s - \mathbf{x}_o) = \frac{1}{4} \left( \operatorname{erf} \left( \frac{\ell/2 + (x_s - x_o)}{\sigma_{rf} \sqrt{2}} \right) + \operatorname{erf} \left( \frac{\ell/2 - (x_s - x_o)}{\sigma_{rf} \sqrt{2}} \right) \right) \\ * \left( \operatorname{erf} \left( \frac{\ell/2 + (y_s - y_o)}{\sigma_{rf} \sqrt{2}} \right) + \operatorname{erf} \left( \frac{\ell/2 - (y_s - y_o)}{\sigma_{rf} \sqrt{2}} \right) \right) \quad (4)$$

185 where  $\operatorname{erf}(x)$  is the error function defined as  $\operatorname{erf}(x) = \frac{1}{\sqrt{\pi}} \int_{-x}^x e^{-t^2} dt$ . The function  $g$  is defined



186 by

$$187 \quad g(\theta_s - \theta_o) = e^{\frac{-d(\theta_s, \theta_o)^2}{2 * \sigma_{fori}^2}} \quad (5)$$

188 with  $\sigma_{fori} = 20^\circ$ . To define the equations for the rate model, we let  $r_E^a$  be the rate of the  
189 excitatory neuron at position  $a$ , and  $r_I^a$  similarly. Both receive the same external input  $I_{Ext}^a$ .

190 The rate equations are:

$$191 \quad \begin{aligned} \tau_E \frac{dr_E^a}{dt} &= -r_E^a + K[I_{Ext}^a + \sum_b W_{EE}^{ab} r_E^b - \sum_b W_{EI}^{ab} r_I^b]_+^{n_E} \\ \tau_I \frac{dr_I^a}{dt} &= -r_I^a + K[I_{Ext}^a + \sum_b W_{IE}^{ab} r_E^b - \sum_b W_{II}^{ab} r_I^b]_+^{n_I} \end{aligned} \quad (6)$$

192 where  $[x]_+ = \max(0, x)$ . The excitatory cells' time constant  $\tau_E = 10 \text{ ms}$ , and the inhibitory  
193 cells' time constant  $\tau_I = 6.67 \text{ ms}$ . We use,  $K = 0.01$ ,  $n_E = n_I = 2.2$ .  $\sum_b W_{XE}^{ab} r_E^b$  is the  
194 recurrent excitatory input to neuron  $X^a$  where  $X = \{E, I\}$ . Similarly,  $\sum_b W_{XI}^{ab} r_I^b$  is the  
195 recurrent inhibitory input.

196 For the conductance-based model, the equations of motion of the membrane potential  
197 and the conductances for each cell are identical for E and I cells. For a cell at  $a$  of type  $X$ ,  
198 the equations are (we omit specifying the type  $X$  for the dynamical variables and parameters  
199 that don't differ between the two types):

$$200 \quad \begin{aligned} \tau_m \frac{dV^a}{dt} &= -(V^a - R_L) + \frac{g_E^a}{g_L} (R_E - V^a) + \frac{g_I^a}{g_L} (R_I - V^a) + \frac{g_{in}^a}{g_L} (R_E - V^a) + \sigma_V \sqrt{2\tau_m} \eta^a(t) \\ \tau_E \frac{dg_E^a}{dt} &= -g_E^a + \tau_E \sum_{b=1}^{N_E} \sum_j g_{XE}^{ab} \delta(t - t_{Ej}^b) \\ \tau_I \frac{dg_I^a}{dt} &= -g_I^a + \tau_I \sum_{b=1}^{N_I} \sum_j g_{XI}^{ab} \delta(t - t_{Ij}^b) \\ \tau_E \frac{dg_{in}^a}{dt} &= -g_{in}^a + \bar{g}_{in}^a + \sqrt{\tau_E} \sigma_{g_{in}} \zeta^a(t). \end{aligned} \quad (7)$$

201 Here  $V^a$  is the membrane potential of the given cell at  $a$ .  $\tau_m$  is the membrane potential  
202 time constant.  $g_E^a$  is the excitatory AMPA-like conductance,  $g_I^a$  is the inhibitory GABA-like

203 conductance and  $g_{in}^a$  is the excitatory input conductance from outside the network.  $R_E$ ,  
 204  $R_I$ , and  $R_L$  are reversal potentials of the excitatory, inhibitory, and leak conductances.  $\tau_E$   
 205 and  $\tau_I$  are the time constants of the excitatory and inhibitory conductances.  $g_{XE}^{ab}$  is the  
 206 conductance of the synapse of the excitatory cell at  $b$  to the given cell at  $a$ , similarly  $g_{XI}^{ab}$   
 207 is the conductance from the inhibitory cell at  $b$ , and  $t_{Xj}^b$  is the time of the  $j^{th}$  spike of the  
 208 cell of type  $X$  at  $b$ .  $\delta(x)$  is the Dirac delta function. Each cell in the network receives input  
 209 from  $N_{input}$  external spiking cells, where  $N_{input}$  is a large number. We assume the spike  
 210 trains are Poisson and invoke the Central Limit Theorem to approximate the input to the  
 211 cell  $\tau_E g_{ext} \sum_{i=1}^{N_{input}} \sum_k \delta(t - t_i^k)$  by a stochastic process with mean  $\bar{g}_{in}^a$  and variance  $\tau_E \sigma_{g_{in}}^2$ ,  
 212 where  $\zeta^a$  is white Gaussian noise with  $\langle \zeta^a(t) \zeta^a(t') \rangle = \delta(t - t')$ . The stochastic dynamics  
 213 will lead  $g_{in}^a$  to have a mean  $\bar{g}_{in}^a$  and a variance  $\sigma_{g_{in}}^2/2$  (Tuckwell, 1988), where

$$\begin{aligned}
 \bar{g}_{in}^a &= N_{input} r_{ext} \tau_E g_{ext} \\
 \sigma_{g_{in}}^2 &= N_{input} r_{ext} \tau_E g_{ext}^2
 \end{aligned}
 \tag{8}$$

215 where  $g_{ext}$  is the amplitude of the conductance evoked when a single external cell spikes,  
 216 and  $r_{ext}$  is the firing rate of the external cells given by Eq. 2. We assume the membrane  
 217 potential is noisy, and model the noise as white Gaussian noise.  $\eta^a(t)$  is a Gaussian random  
 218 variable with mean 0 and variance 1, and  $\sigma_V$  is the standard deviation of the membrane  
 219 potential fluctuations. In the simulations we set  $\sigma_V = 6.85 mV$  to get spontaneous activity  
 220 similar to what has been reported in (Chen et al., 2009; Gur and Snodderly, 2008; Ringach  
 221 et al., 2002). In the model the mean spontaneous activity of the excitatory cells is about  
 222 1.5 Hz, and of the inhibitory cells is about 3 Hz. The parameters for both E and I cells are  
 223 as follows:  $\tau_m = 15 ms$ ;  $\tau_E = \tau_I = 3 ms$ ;  $R_L = -70 mV$ ;  $R_E = 0 mV$ ;  $R_I = -80 mV$ ;  
 224  $g_L = 10 nS$ ;  $N_{input} = 200$  and  $g_{ext} = 0.1 nS$ . We take threshold voltage  $V_{th} = -50 mV$  and  
 225 after-spike rest voltage to be  $6 mV$  below threshold,  $V_r = -56 mV$ , as in Troyer and Miller  
 226 (1997). After the cell spikes, it goes into a refractory period with  $\tau_{ref} = 3 ms$ .

227 Similar to the rate model, the conductance values are given by  $g_{XY}^{ab} = g_{XY} p_{XY}(|\mathbf{x}_a -$

228  $\mathbf{x}_b|)q_{XY}(d(\theta_a, \theta_b))$ . The parameters  $g_{XY}$  are:  $g_{EI} = 3.3 nS$  and  $g_{II} = 2 nS$ ; at distances less  
229 than  $L_o$ ,  $g_{EE} = 1.8 nS$  and  $g_{IE} = 1.76 nS$ ; and at distances greater than  $L_o$ ,  $g_{EE} = 0.7 nS$   
230 and  $g_{IE} = 0.65 nS$ . Again  $L_o = 324 \mu m$  as in the rate model.

231 To measure the strength of the surround suppression in the network, we compute the  
232 suppression index (SI) defined as:

$$233 \quad SI = \frac{r_{max} - r_{inf}}{r_{max}} \quad (9)$$

234 where  $r_{max}$  is the response to a stimulus size that elicits maximum response, and  $r_{inf}$  is the  
235 response for a very large stimulus. To measure whether the presence of a surround stimulus  
236 facilitates or suppresses the response of a cell compared to its response to a center-only  
237 stimulus, we define a modified suppression index:

$$238 \quad SI_m = \frac{r_{(center-only)} - r_{(center+surround)}}{r_{(center-only)}} \quad (10)$$

239  $SI_m$  negative means facilitation, while  $SI_m$  positive means suppression.

240 In experiments on the surround tuning to the center orientation, we fix the center stimulus  
241 diameter, and the inner and outer annulus diameters to  $(1.3^\circ, 4.3^\circ, 21.6^\circ)$  and set both stimuli  
242 contrasts to 100. In these experiments we record the activity of a single neuron as we vary  
243 the stimulus orientations, and we roughly pick the largest annulus inner diameter at which  
244 the phenomena is still observed. This corresponds to an annulus inner radius of  $2.15^\circ$  or  
245  $1.1 mm$  which is roughly the span of E-to-I monosynaptic connections. In feature-specific  
246 suppression experiments we fix the center stimulus diameter, and the inner and outer annulus  
247 diameters to  $(1.7^\circ, 3.9^\circ, 21.6^\circ)$ . In these experiments we follow the procedure in Trott and  
248 Born (2015) to make our results directly comparable with experimental data. Thus, we use  
249 a slightly bigger center stimulus to obtain a better fit of the population rates (see Result  
250 3 for more details). The contrast is set to 16.4 (representing 80% of the maximal input  
251 strength), for each component of the plaid as well as the surround in the rate model, and to

252 50 (representing 99.5% of the maximal input) in the conductance-based model.

253 In all experiments, cells are sampled randomly from locations away from the boundary.  
254 We first randomly pick 100 locations within the region we define as away from the boundary  
255 ( $20 < x < 60, 20 < y < 60$ ). Cells in all experiments are randomly picked from those 100  
256 locations.

## 257 Results

258 We first check that our network is functioning as an SSN, by checking for several salient  
259 SSN behaviors. The SSN shows a transition, with increasing input strength, from a weakly  
260 coupled, largely feedforward driven regime for weak external input, to a strongly coupled,  
261 recurrently-dominated regime for stronger external input (Ahmadian et al., 2013). This  
262 transition can account for many aspects of summation of responses to two stimuli and of  
263 center-surround interactions and their dependencies on stimulus contrast (Rubin et al., 2015).  
264 Our network shows the characteristic signs of this transition (Rubin et al., 2015): the net  
265 input a neuron receives grows linearly or supralinearly as a function of external input for  
266 weak external input, but sublinearly for stronger external input (Fig. 2A); this net input is  
267 dominantly external input for weak external input, but network-driven input for stronger  
268 external input (Fig. 2B); the network input becomes increasingly inhibitory with increasing  
269 external drive (Fig. 2C); and a surround stimulus of a fixed contrast can be facilitating for  
270 a weak center stimulus, but becomes suppressive for stronger external drive to the center  
271 (Fig. 2D).

272 We then explore whether lateral connections in V1 are capable of generating several  
273 phenomena that emerge due to center-surround interaction.

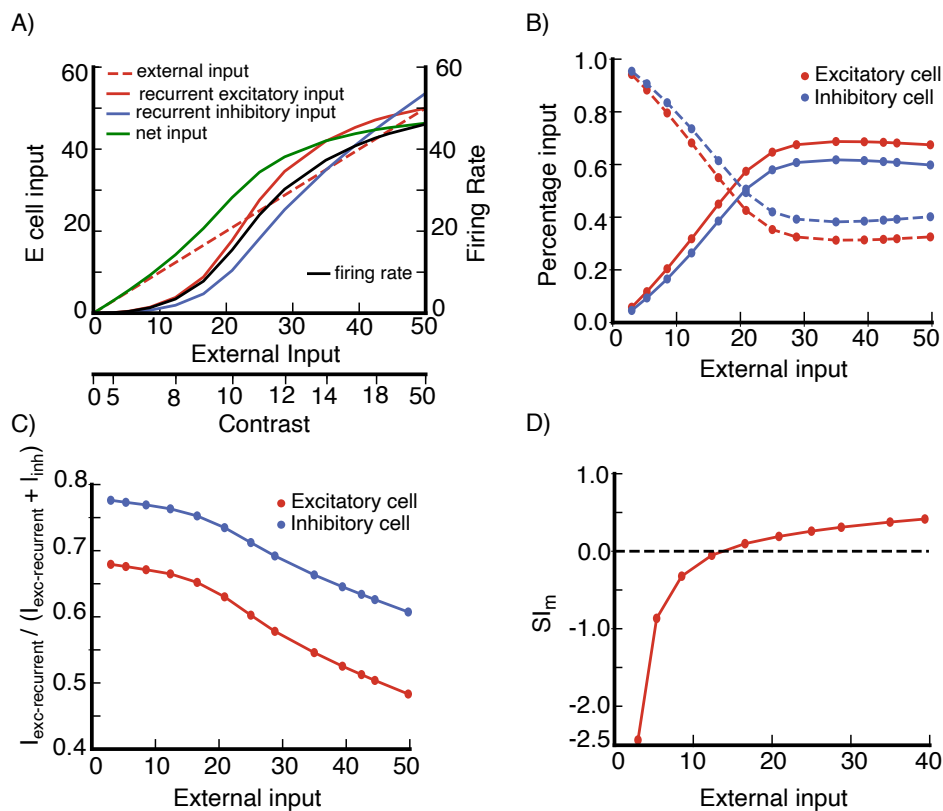

**Figure 2: Stabilized Supralinear Network (SSN) behavior of the model network (A)** Inputs to an excitatory (E) cell and its firing rate vs external input, the cell is at a randomly selected grid location (see section Model Details). Stimulus contrast level corresponding to external input is shown on the bottom axis. The net input is defined as  $(I_{ext} + I_{exc-recurrent} - I_{inh})$ , where  $I_{ext}$  is the external input to the cell,  $I_{exc-recurrent}$  is the cell's recurrent excitatory input from the network, and  $I_{inh}$  its recurrent inhibitory input from the network,  $I_{inh}$  is defined to be positive, see section Model Details for the expressions of  $I_{exc-recurrent}$  and  $I_{inh}$ . (B) Percentage of external and network inputs as a function of external input for the excitatory cell in (A) and an inhibitory cell at the same grid location (dashed line is external input, solid line is network input). Here, the total input is defined as  $(I_{ext} + I_{exc-recurrent} + I_{inh})$ , and the network input is  $(I_{exc-recurrent} + I_{inh})$ . (C)  $I_{exc-recurrent} / (I_{exc-recurrent} + I_{inh})$  as a function of external input for the excitatory and inhibitory cells in (A,B). In panels (A-C) we use a stimulus of diameter  $2.16^\circ$  centered on the cell's retinotopic position and with the cell's preferred orientation. (D) Surround Facilitation to Suppression transition: a near surround can be facilitating or suppressing depending on the center stimulus contrast.  $SI_m$  negative means facilitation, while  $SI_m$  positive means suppression (see section Model Details, Eq.10 for the definition of  $SI_m$ ). In panel (D) the data is from an excitatory cell at a randomly selected grid location(see section Model Details); surround stimulus has contrast  $C = 12$ , and inner and outer diameters  $0.865^\circ$  and  $4.32^\circ$  respectively; the center stimulus diameter is  $0.65^\circ$ ; both center and surround stimuli are centered on the cell's retinotopic position, with the cell's preferred orientation.

## 274 **Result 1: Surround Suppression**

275 We first investigate surround suppression, a widely studied phenomena in V1 and other  
276 sensory areas in multiple species (Angelucci et al., 2017). Ozeki et al. (2009) showed in  
277 anesthetized cat V1 that, after presenting an optimal center-only stimulus, presentation of  
278 an iso-oriented surround stimulus decreased firing rates, and decreased both the inhibition  
279 and excitation neurons receive. Adesnik (2017) similarly showed that inhibition as well as  
280 excitation were decreased by surround suppression in awake mice. Ozeki et al. (2009)  
281 showed that suppression of inhibition as well as excitation required that the network be  
282 an *inhibition stabilized network*, or ISN, meaning that, if inhibition were frozen and could  
283 not respond dynamically, the excitatory subnetwork would be unstable. Rubin et al. (2015)  
284 demonstrated a circuit model with one spatial dimension in which surround suppression  
285 was accompanied by a decrease of inhibition as well as excitation, and showed contrast  
286 dependence like that seen in visual cortex. They also studied a model with two spatial  
287 dimensions that was in a different parameter regime but that showed similar behaviors.  
288 However, since Rubin et al. (2015) was published, we discovered that the 2-D spatial model  
289 of V1 studied there did not show a decrease in inhibition received with surround suppression,  
290 and to our knowledge no other 2-D spatial model of V1 has shown this. We investigate the  
291 conditions under which surround suppression can emerge in a 2-d spatially extended model  
292 of layer 2/3 of V1 with a decrease in inhibition received. More specifically, what structure of  
293 connectivity and synaptic efficacies can achieve this? Before addressing this question, we first  
294 show that our model replicates surround suppression behavior and its contrast dependence  
295 observed in Rubin et al. (2015).

296 To study surround suppression, we record the firing rates of a cell in the network, as  
297 we vary the diameter of a high contrast stimulus centered on the cell's retinotopic position  
298 and with orientation identical to the recorded cell's preferred orientation. In the model both  
299 excitatory (E) and inhibitory (I) cells are surround-suppressed. However, excitatory cells  
300 are more strongly surround suppressed than inhibitory cells, as illustrated by an E and I

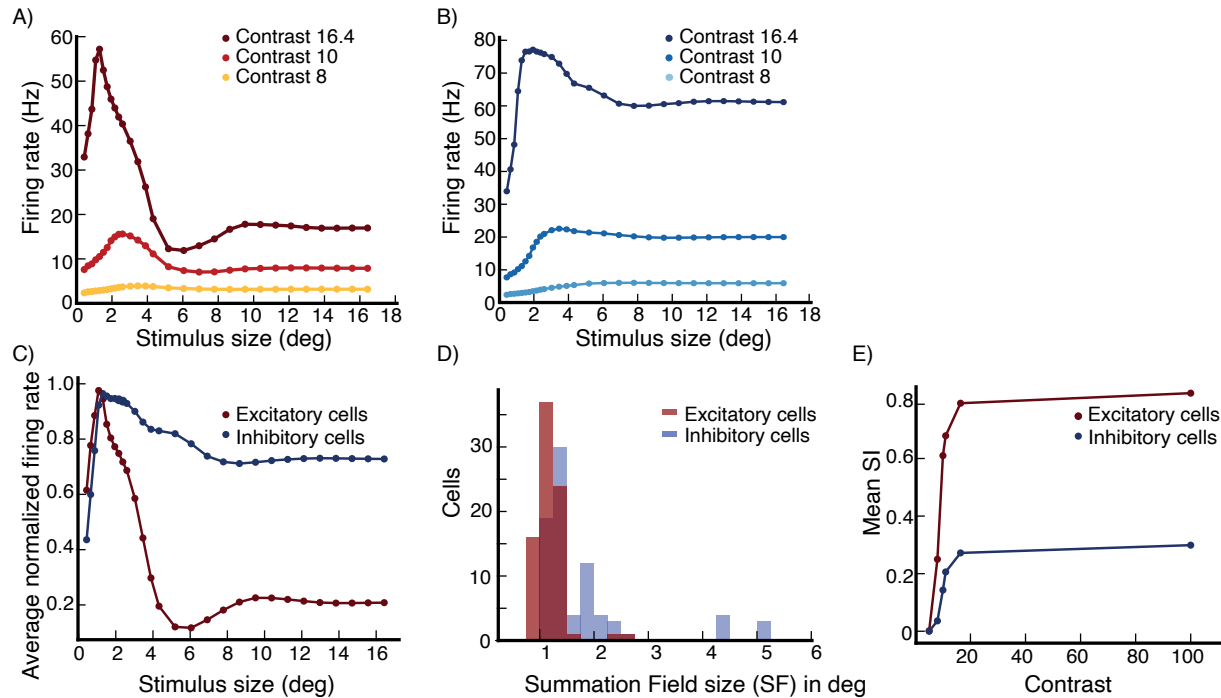

**Figure 3: Surround suppression** (A,B) The firing rates of an excitatory (E) cell (A) and an inhibitory (I) cell at the same grid location (B) vs. stimulus size. Different colors correspond to different stimulus contrast levels, high ( $C=16.4$ ; external input 80% of maximal), medium ( $C=10$ ; external input 42% of maximal) and low ( $C=8$ ; external input 25% of maximal). The cells are at a randomly selected grid location (see section Model Details). (C) The average firing rate of 80 E cells at randomly selected grid locations (see section Model Details), and of 80 I cells at the same grid locations, after normalizing each cell's rates so that its peak rate is 1.0, vs. stimulus size for a high contrast stimulus ( $C=16.4$ ). (D) The distribution of Summation Field sizes (SFS) of the E and I cells used to produce panel (C), the mean SFS for the E cells is 1.14 deg and for the I cells is 1.75 deg. (E) The mean suppression index of the E cells and I cells used to produce panel (C) versus stimulus contrast, the mean Suppression Index (SI) for E and I cells changes from little or no suppression (low SI's) for very weak stimuli, to stronger suppression (higher SI's) for stronger stimuli, with E cells showing much stronger suppression than I cells. The error bars are too small to show properly, they are of order  $10^{-2}$  or smaller.

301 cell at a randomly selected grid location (see section Model Details) (Fig. 3A,B) and by the  
302 average size tuning across 80 E and 80 I cells (Fig. 3C) for a high contrast stimulus,  $C=16.4$ .  
303 Accordingly, the summation field sizes – the size of a stimulus driving optimal response,  
304 before further increase in size causes response suppression – of E cells are smaller than those  
305 for I cells (Fig. 3D).

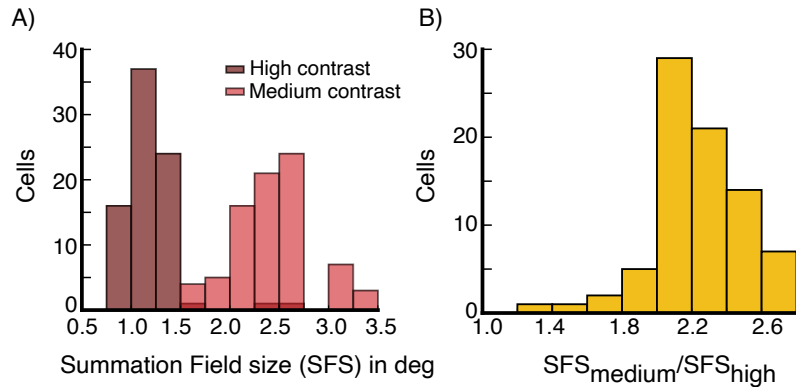

**Figure 4: Surround suppression, summation field sizes** (A) The distribution of summation field sizes for 80 excitatory (E) cells (same E cells used to produce panel Fig. 3C), at contrast  $C=16.4$  (dark red color) and contrast  $C=10$  (light red color). (B) The distribution of the ratio of the summation field sizes in (A). The summation field size of all cells is smaller for the higher contrast stimulus.

306 We repeat the above experiment with different contrast levels. The strength of surround  
307 suppression increases with increasing stimulus contrast (Fig. 3A,B). The mean suppression  
308 index (SI) increases from little or no suppression for weak contrasts to stronger suppression  
309 for stronger contrasts (Fig. 3E). For a relatively high contrast stimulus ( $C=16.4$ , representing  
310 80% of the maximal input strength), the mean suppression index (SI) is 0.79 for the E cells  
311 and 0.27 for the I cells (where 0 is no suppression and 1 is complete suppression). Similarly,  
312 the summation field size shrinks with increasing contrast, as we illustrate for E cells in  
313 Fig. 4A,B, as in (Sceniak et al., 1999). The summation field sizes of I cells behave similarly.

314 We examine whether surround suppression in the network is accompanied by a decrease  
315 in excitation and inhibition, as reported by Ozeki et al. (2009), rather than simply being  
316 due to ramping up of inhibitory input. The size tuning of the excitatory and inhibitory  
317 input currents to the E cell in Fig. 3A at high contrast ( $C=16.4$ ) reveals that both currents



318 indeed show surround suppression (Fig. 5A). We then look at the average size tuning of  
319 these currents across cells, after normalizing each cell's curve for each current to have a peak  
320 of 1. Both E cells (Fig. 5B) and I cells (Fig. 5C) show surround suppression of both their  
321 excitatory and their inhibitory currents.

322 We then wish to directly compare, across cells, the currents for a small, nearly-optimally-  
323 sized stimulus to those for a large, suppressive stimulus. To compare to experiments, there  
324 is now a problem to be solved: as modelers we know the exact stimulus size that gives peak  
325 response, and can compare inhibition received for that size to inhibition received for a large  
326 size. However experimenters do not know the optimal size, and must choose some size in that  
327 vicinity, which may evoke less inhibition than the peak (see Fig. 3). Thus, if we choose the  
328 optimal size for comparison, we may bias our results towards seeing a decrease in inhibition,  
329 compared to experimental procedures. To avoid this, we follow a procedure similar to that  
330 of Ozeki et al. (2009). We measure the excitatory and inhibitory inputs for a small stimulus  
331 size with diameter  $d_s$  around which the cells respond close to maximally, and for a very large  
332 stimulus at which all cells are surround suppressed. We take  $d_s$  to be equal to the median  
333 of all stimulus diameters for which the sampled cells respond maximally. The results are  
334 entirely similar if  $d_s$  is taken to be the mean rather than the median.

335 Using this procedure, for excitatory inputs and for inhibitory inputs to E and to I cells, we  
336 plot the input current at small stimulus size vs. the current at large stimulus size (Fig. 5D,E).  
337 In Fig. 5D we plot the excitatory inputs and inhibitory inputs respectively to 80 excitatory  
338 cells, at small stimulus size against those at large stimulus size. Both excitatory and in-  
339 hibitory inputs are smaller for the large suppressive stimulus. Fig. 5E shows the same data  
340 for 80 inhibitory cells. Thus, for both excitatory and inhibitory cells in the model, surround  
341 suppression is accompanied by a decrease in excitation and inhibition that the cell receives.

342 While we cannot exhaustively search all parameters, in our explorations of parameters,  
343 we have found the surround suppression of inhibitory as well as excitatory input to depend  
344 on two elements of the connectivity. First, locally, roughly over distances of about  $L_o$  (the

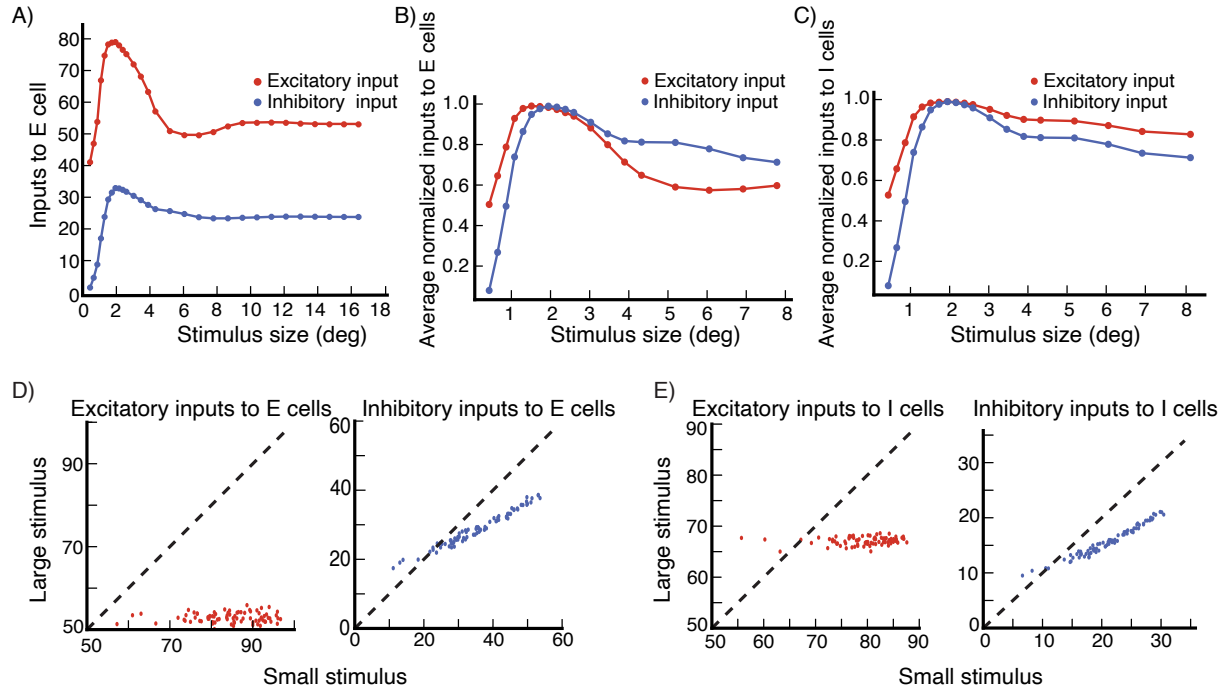

**Figure 5: Surround suppression, inputs to cells** (A) The excitatory (red) and inhibitory (blue) total input to the excitatory (E) cell in Fig. 3A, shown for the high contrast stimulus ( $C=16.4$ ; external input 80% of maximal), both show surround suppression. (B,C) The size tuning of the averaged normalized excitatory and inhibitory inputs (each normalized to have peak value 1) to excitatory (E) cells (B) and inhibitory (I) cells (C) for contrast  $C=16.4$  (same cells used to produce panel Fig. 3C). Note the change in horizontal axis between panels (A) and (B,C). (D) The excitatory and inhibitory inputs to E cells (same E cells used to produce panel Fig. 3C) for a large stimulus (for which all the cells are surround suppressed) are shown vs. their values for a small stimulus (with size given by the average size that yields maximal response across cells). Panel (E) is the same as (D) but for I cells (same I cells used to produce panel Fig. 3C). Stimulus contrast  $C=16.4$ .

345 distance over which lateral connections are most dense, see section Model Details), the  
 346 cells must be strongly enough connected so that, as the stimulus size increases, the local  
 347 circuit around the recorded cell goes through the SSN transition from being mainly driven  
 348 by the feedforward input to being dominated by recurrent currents. This occurs through  
 349 the increase in effective synaptic weights with increased external drive to the network due  
 350 to the expansive, supralinear neuronal input/output function, which is the fundamental  
 351 mechanism underlying the SSN (see (Ahmadian et al., 2013; Rubin et al., 2015) for a detailed  
 352 description of the SSN mechanism). At the transition, the growth of effective excitatory  
 353 synaptic strengths is sufficient that the excitatory subnetwork becomes unstable by itself

354 (Ahmadian et al., 2013), but the network is stabilized by feedback inhibition. This means  
355 that the local circuit becomes an inhibition stabilized network (ISN), which was the condition  
356 for surround suppression of inhibitory input identified in (Ozeki et al., 2009), based on the  
357 ISN mechanism initially identified by (Tsodyks et al., 1997). We put the network into a  
358 particular regime of the SSN that is thought to be most strongly non-linear, though we  
359 don't know if this is necessary since we did not do an exhaustive parameter search. This  
360 regime, using parameters defined in Ahmadian et al. (2013), is defined by  $\Omega_E < 0$  (in  
361 particular, we use  $\Omega_E < 0 < \Omega_I$ ) where, for equal inputs to the excitatory and inhibitory  
362 cells as we use here,  $\Omega_E = W_{II} - W_{EI}$  and  $\Omega_I = W_{IE} - W_{EE}$ , with  $W_{XY}$  the total synaptic  
363 weight from units of type Y to a unit of type X. This produces a regime in which responses  
364 saturate with increasing external input (and ultimately would supersaturate for sufficiently  
365 strong external input). In particular, for our connectivity parameters,  $\Omega_E = -0.49 \pm 0.01$   
366 and  $\Omega_I = 3.59 \pm 0.03$ .

367 The second element we have found critical is that the ratio of projection strength of long-  
368 range horizontal connections to I cells vs. E cells must increase with increasing distance,  
369 that is, the E-to-I connections must be effectively longer range than E-to-E connections.  
370 Furthermore, the excitatory input received by I cells from far away E cells should not be  
371 large compared to the excitatory input they receive from nearby excitatory cells. Then, with  
372 increasing stimulus size, the loss of excitatory input to I cells from surround suppression of  
373 nearby E cells can exceed the gain of excitatory input from far away E cells, causing the I  
374 cells to be surround suppressed. Note that, in our model (as in (Rubin et al., 2015)), the  
375 I cells have larger summation fields than the E cells (Fig. 3C,D). This means that there is  
376 an intermediate range of stimulus sizes for which inhibitory firing rates continue on average  
377 to increase with stimulus size, while excitatory cells are surround suppressed. With further  
378 increase in stimulus size, both E and I cells are suppressed.

## 379 **Result 2: Surround Tuning to the Center Orientation**

380 Cells in V1 are found to be suppressed maximally when the surround stimulus orientation  
381 matches the orientation of the center stimulus, regardless of whether that orientation matches  
382 the cell's preferred orientation (Shushruth et al., 2012; Sillito et al., 1995; Trott and Born,  
383 2015). This might enable the cell to detect orientation discontinuities or help in foreground-  
384 background separation. A similar behavior has been observed for other stimulus features,  
385 such as spatial frequency and velocity (Shen et al., 2007).

386 A previous model (Shushruth et al., 2012) showed that this behavior could arise if cells  
387 received strong, weakly tuned excitatory and inhibitory input from the local network, while  
388 the surround drove more strongly tuned inhibition of the excitatory cells and excitation  
389 of the inhibitory cells. Then, when the center stimulus differed from the recorded cell's  
390 preferred orientation, the cell would receive a great deal of local recurrent excitation and  
391 inhibition from cells preferring the stimulus orientation, which would be the most strongly  
392 activated cells. A surround stimulus matched to the center stimulus would most strongly  
393 target these most activated cells. Withdrawal of input from those cells would then cause  
394 greater suppression of the firing of the recorded cell than would direct suppression from  
395 a surround stimulus at the cell's preferred orientation. Therefore, suppression would be  
396 greatest when the surround stimulus orientation matched the center stimulus orientation.

397 We use similar reasoning here, but now in the context of the SSN model with power-law  
398 rather than linear-rectified input/output functions. Our long-range projections are excitatory  
399 onto both E and I cells, whereas in (Shushruth et al., 2012) they were inhibitory onto E  
400 cells and excitatory onto I cells. In addition, the model of (Shushruth et al., 2012) was  
401 not recurrent, because the input from one cell to another was simply determined by the  
402 difference in their preferred orientations, regardless of the firing rate of the presynaptic cell  
403 (and thus was a constant, independent of the stimulus); and the surround input to a cell was  
404 determined only by the difference between the cell's preferred orientation and the surround  
405 stimulus orientation, and not by the firing rates of lateral cells responding to the surround

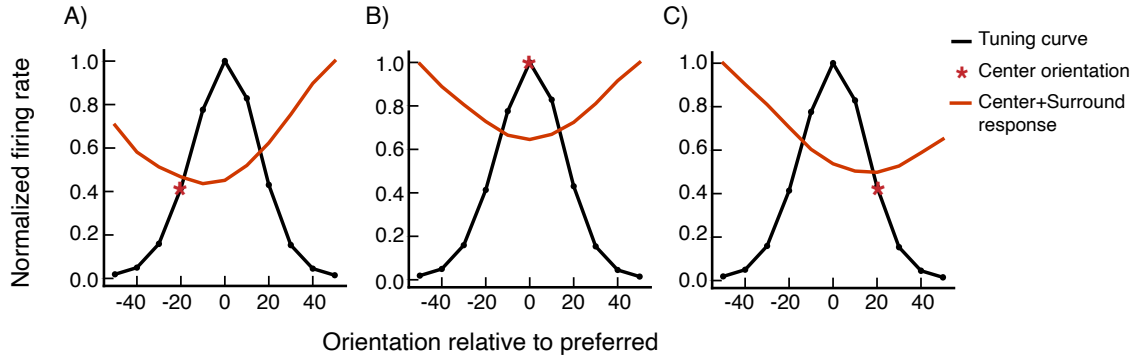

**Figure 6: Surround tuning to the center orientation in an excitatory (E) cell** The orientations are relative to the cell's preferred orientation. The black curves show the cell's orientation tuning curve for a center-only stimulus (*i.e.*, firing rate vs. center orientation), normalized so the maximum response is 1.0. The red curves show the similarly normalized tuning to surround orientation for a fixed center stimulus. In each panel, the red asterisk marks the fixed center orientation: (A) center at preferred minus  $20^\circ$ , (B) center at preferred and (C) center at preferred plus  $20^\circ$ .

406 stimulus. We use a recurrent model.

407 We record the firing rate of cells in the network for different center orientations. For each  
408 center orientation, we then present a stimulus in the surround, rotate its orientation, and  
409 record the cell's firing rate for each center-surround orientation configuration. In an exci-  
410 tatory cell (Fig. 6), we study tuning to center orientation absent a surround (black curves)  
411 and then tuning to surround orientation for a fixed center stimulus (red curves). The most  
412 suppressive surround orientation (minimum of red curve) is pulled strongly toward the center  
413 orientation (red asterisk) as the center orientation is varied from  $-20^\circ$  relative to preferred  
414 orientation (Fig. 6A), to preferred (Fig. 6B), to  $+20^\circ$  relative to preferred (Fig. 6C). Similar  
415 results are seen more generally in 67 excitatory cells at randomly selected grid locations  
416 (Fig. 7). The surround orientation producing maximum suppression is pulled strongly to-  
417 wards the center orientation (Fig. 7A,C-D) and in most cases is within  $10^\circ$  of the center  
418 orientation (Fig. 7B).

419 As described above, surround tuning to the center orientation arises due to the strong,  
420 broadly tuned local connectivity profile in orientation space, along with the more sharply  
421 tuned surround input, which causes maximal input to the cell to come from cells preferring  
422 the center stimulus rather than from cells with the same preferred orientation as the recorded

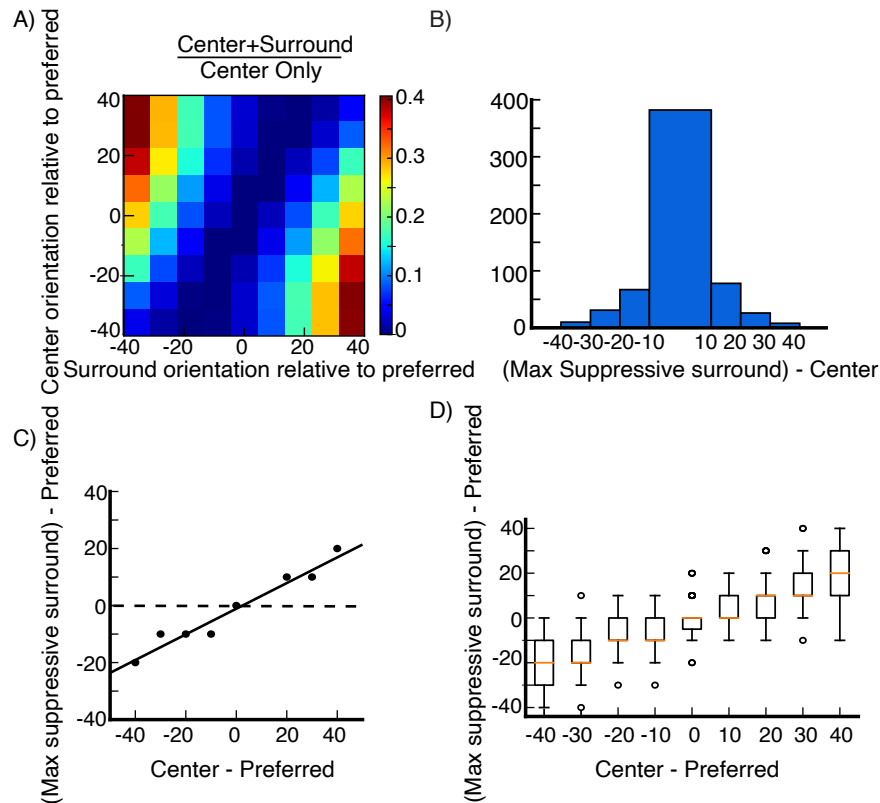

**Figure 7: Surround tuning to the center orientation** Surround tuning in 67 excitatory (E) cells at randomly selected grid locations (see section Model Details). Both center and surround orientations are varied from preferred minus  $40^\circ$  to preferred plus  $40^\circ$  in increments of  $10^\circ$ . (A) Average surround modulation map. For each cell, the map is obtained by dividing center-surround responses by the corresponding center-only responses, each row has its minimum value subtracted. (B) Histogram of the difference between the orientation of the surround that maximally suppresses the cell's firing rate, and the center stimulus orientation. The data is pooled over all cells and center orientations. (C) Orientation of the surround that maximally suppresses the cell's firing rate plotted against the center stimulus orientation, averaged over all cells. (D) Whisker plot of orientation of the surround that maximally suppresses the cell's firing rate against the center stimulus orientation, the box extends from quantile Q1 to Q3, the orange line is the median. The upper whisker extends to last datum less than  $Q3 + k \cdot IQR$ , similarly, the lower whisker extends to the first datum greater than  $Q1 - k \cdot IQR$ , where IQR is the interquartile range ( $Q3 - Q1$ ) and  $k=1.5$ , the circles represent the outlier data. In (A), (C), (D), orientations are shown relative to preferred.

423 cell. This makes suppression targeted to cells preferring the center stimulus more potent than  
 424 suppression targeted to cells preferring the recorded cell's own preferred orientation.

### 425 **Result 3: Feature-Specific Surround Suppression**

426 Surround suppression in V1 is not blind to the center stimulus, as we have just seen. This also  
427 manifests in the *feature-specificity* of surround suppression (Trott and Born, 2015): if multiple  
428 stimuli are present in the cell's center, the surround more strongly suppresses the response  
429 component driven by the center stimulus whose orientation matches the surround's. We test  
430 whether V1 lateral connections can mediate such computation. We follow the procedure  
431 described in Trott and Born (2015).

432 We record the firing rate of a small population of neurons to each of two oriented gratings.  
433 For each stimulus, we fit the average response vs. preferred orientation across the population  
434 with a Von Mises function, call these functions  $P_1$  and  $P_2$  (Fig. 8A). We then record the  
435 population's firing rates to a center plaid stimulus, the superposition of the two individual  
436 gratings. If the two gratings differ by, *e.g.*,  $60^\circ$ , we will call this a  $60^\circ$  plaid or a plaid angle  
437 of  $60^\circ$ . We fit the population's response to the plaid stimulus as a linear combination of the  
438 two components,  $R_{\text{plaid}} = w_1 P_1 + w_2 P_2$ .

439 We then introduce a surround stimulus whose orientation matches the second component  
440 of the plaid center stimulus, and measure the new values of  $w_1$  and  $w_2$ . We repeat the same  
441 procedure as we rotate the plaid, each time matching the surround stimulus to the orientation  
442 of the 2nd plaid component. For responses to a  $60^\circ$  plaid alone,  $w_1$  and  $w_2$  on average have  
443 about equal strength, but the addition of a surround stimulus matched to the second plaid  
444 component suppresses  $w_2$  much more than  $w_1$  (Fig. 8B,C).

445 We carry out this experiment for different plaids, with plaid angles  $[-60^\circ, -30^\circ, 0^\circ, 30^\circ,$   
446  $60^\circ, 90^\circ]$ . The mean values of  $w_1$  and  $w_2$  across all of these plaids cluster around  $w_1 = w_2$   
447 for the plaid stimulus alone (Fig. 9A), but are heavily shifted towards  $w_1$  when the surround  
448 stimulus matched to the second plaid component is added (Fig. 9B). In Fig. 9C we show  
449 the mean values of data points in Fig. 9A,B for each plaid angle. In the absence of a sur-  
450 round stimulus there is no difference between  $w_1$  and  $w_2$ . When a surround stimulus with  
451 orientation matching the plaid's second component is introduced, both components of the

452 plaid are suppressed, however, we clearly see that the second component is suppressed more.  
453 Hence, the surround stimulus suppress mostly the center stimulus component that has sim-  
454 ilar feature. In our model, this phenomena emerges because long range lateral connections  
455 connect cells with similar preferred orientations. The surround stimulus mostly excite cells  
456 with preferred orientation close to its orientation. These cells in turn will mostly suppress  
457 the cells at the center which have similar preferred orientation. Finally, we point out that  
458 the results remain the same if we repeat the same experiment and record from a single cell  
459 rather than from a small local population.

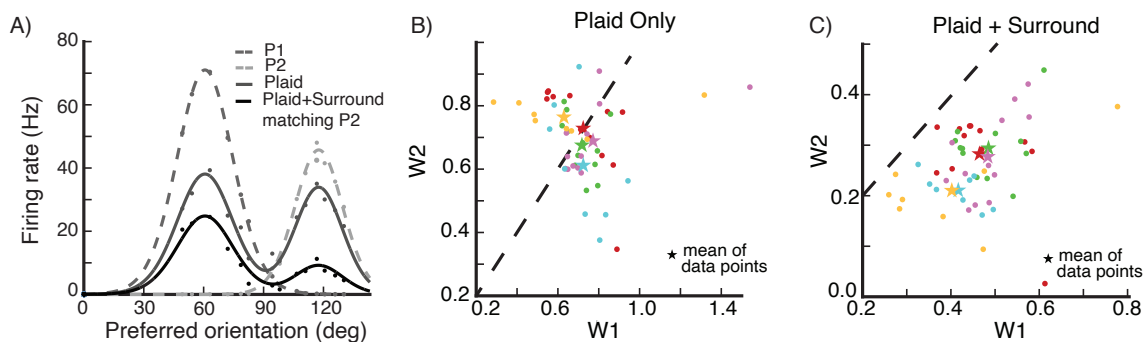

**Figure 8: Feature-specific surround suppression** (A) The firing rate of a small population of neurons in response to a center stimulus. The neurons are binned in  $5^\circ$  bins according to their preferred orientation. The dots are the data points, and the lines are the Von-Mises-function fits to the data. The medium gray points and dashed line are the population response to the first component of the plaid ( $P_1$ ). The light gray points and dashed line are the population response to the second component of the plaid ( $P_2$ ). The dark gray points and solid line are the population response to the plaid. The black points and solid line are the population response to the plaid in the presence of a surround stimulus whose orientation matches the plaid's second component. (B,C) values of  $w_1$  and  $w_2$  (the weightings in fitting the plaid population response to a weighted sum of the two component responses), for a  $60^\circ$  center plaid stimulus, shown for 12 different plaid rotations (every  $10^\circ$ ), recorded from five different populations (indicated by colors). The populations are centered around randomly selected grid locations (see section Model Details). Missing data points imply that we can not find a good fit of the data for certain stimulus configurations. The star symbols are the mean values of  $w_1$  and  $w_2$  for each location. (B) Responses to plaid center stimulus only. (C) Responses to plaid center stimulus in the presence of a surround stimulus with orientation equal to the plaid's second component. Dashed lines are unit diagonals, along which  $w_1 = w_2$



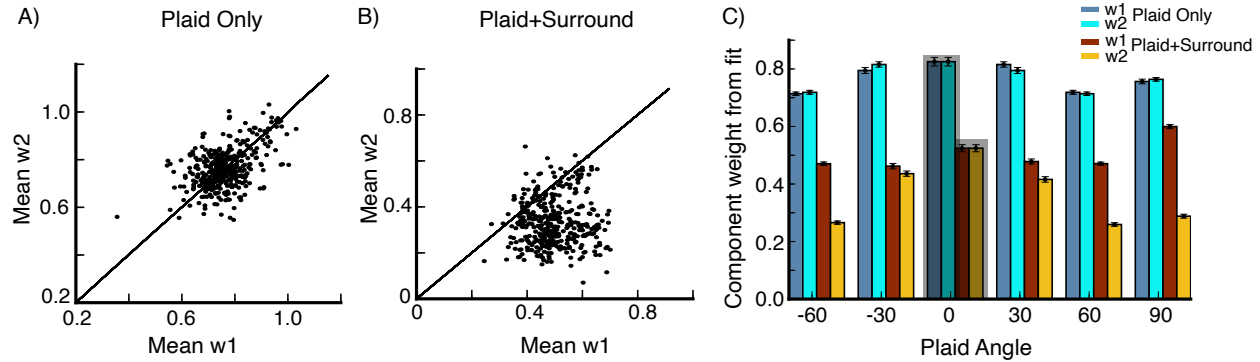

**Figure 9: Feature-specific surround suppression** (A,B) Mean  $w_1$  is plotted against mean  $w_2$  for plaid angles  $[-60^\circ, -30^\circ, 30^\circ, 60^\circ, 90^\circ]$  from 80 populations, centered around 80 randomly selected grid locations (see section Model Details). The mean values of  $w_1$  and  $w_2$  are obtained from averaging data for different rotations of the plaid (A) for plaid center stimulus only (B) for plaid center stimulus in the presence of surround stimulus with orientation equal the plaid's second component. (C) Mean values of the data points in (A) and (B) for different plaid angles, we also include the data for plaid angle  $0^\circ$ , error bars are the s.e.m.

#### 460 **Result 4: Activity Decay Time**

461 While exciting V1 with a visual stimulus, Reinhold et al. (2015) abruptly silenced the tha-  
 462 lamic input to V1, by silencing the lateral geniculate nucleus (LGN) through optogenetic  
 463 stimulation of the thalamic reticular nucleus (TRN). They showed that, after thalamic si-  
 464 lencing, the cortical activity in V1 exhibited a fast decay, two orders of magnitude faster  
 465 than the decay after visual stimulus offset. The authors called this decay time after thalamic  
 466 silencing the cortical decay function (CDF). The CDF across all V1 layers was of the order  
 467 of 10 ms, in particular for multiunits the CDF + s.e.m. was L2/3:  $9.8 \pm 1.7$  ms, L4:  $9.0 \pm 2.2$   
 468 ms, L5a:  $8.9 \pm 1.3$  ms, L5b:  $15.7 \pm 2.5$  ms and L6:  $7.6 \pm 1.5$  ms. The CDF was almost the  
 469 same in awake and anesthetized mice. Furthermore, the authors found that the CDF was  
 470 independent of the stimulus contrast.

471 We test if the dynamics in our network are in agreement with what has been reported.  
 472 Since we only model layer 2/3 in V1, silencing LGN is equivalent to the removal of the  
 473 feedforward input in our model. We record the activity of a cell for two stimulus sizes  $2^\circ$  and  
 474  $10^\circ$ , each at two contrast levels, high contrast ( $C=17$ ) and low contrast ( $C=9$ ). In all cases,

475 the feedforward input is removed at 200 ms. To obtain the activity decay time constant, we  
476 fit the decaying activity with an exponential function. We find the decay time constant for  
477 the excitatory cells to be roughly 10 ms, which is in agreement to what has been reported  
478 in Reinhold et al. (2015) as we show in Fig. 10. For 50 excitatory cells at randomly selected  
479 grid locations, the activity decay time constant (mean  $\pm$  s.e.m.) for a  $2^\circ$  stimulus at high  
480 contrast is  $10.04 \pm 0.01$  ms and at low contrast is  $9.99 \pm 0.02$  ms, and for a  $10^\circ$  stimulus at  
481 high contrast 9.75 ms and at low contrast 9.76 ms (when we do not report it, the s.e.m. is too  
482 small). The activity decay time constant is almost independent of the stimulus contrast level  
483 and size. It is roughly given by the excitatory cells' time constant in the model. Similarly, the  
484 activity decay time scale for the inhibitory cells is roughly given by the inhibitory cells' time  
485 constant. For  $2^\circ$  stimulus at high contrast the inhibitory cells activity decay time constant  
486 is  $6.93 \pm 0.01$  ms and at low contrast  $6.73 \pm 0.04$  ms, and for the  $10^\circ$  stimulus at high contrast  
487 it is  $6.69 \pm 0.03$  ms and at low contrast  $6.98 \pm 0.05$  ms.

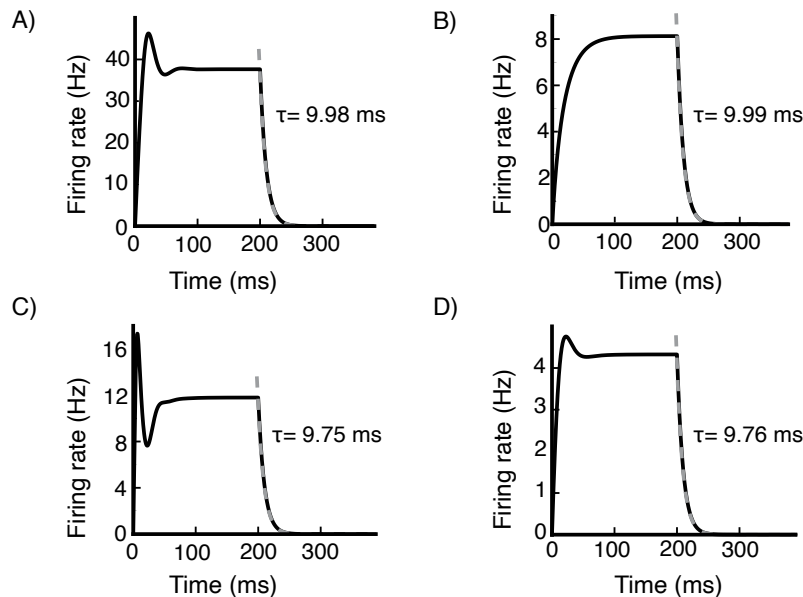

**Figure 10: Activity decay time** The time response of an excitatory (E) cell at a randomly selected grid location (see section Mode Details) for various stimulus conditions. (A) and (B)  $2^\circ$  size stimulus at high contrast (C=17) and low contrast (C=9) respectively. (C) and (D)  $10^\circ$  size stimulus at high contrast (C=17) and low contrast (C=9) respectively. The feedforward input is removed at 200 ms. The activity decay time constant is obtained by fitting an exponential function to the decaying activity. The activity decay time constant is roughly independent of the stimulus contrast level and size.

## 488 **Result 5: Conductance-based Spiking Model**

489 To test whether our results depend on the neuron model, we replace the rate units in the  
490 network with conductance based spiking units (Eq. 7 in section Model Details). To make  
491 the model more biologically realistic, we assume the excitatory and the inhibitory cells have  
492 spontaneous activity levels of 1.5 Hz and 3 Hz respectively. We first show how the input  
493 currents to a cell and its firing rate change with external drive (Fig. 11A,B). The net input  
494 current a neuron receives increases rapidly as a function of external current for weak external  
495 input, but sublinearly for stronger external input (Fig. 11A). The network input becomes  
496 increasingly inhibitory with increasing external drive (Fig. 11C).

497 Most of our key findings in the rate model also hold in the spiking model. Both excitatory  
498 cells and inhibitory cells are surround suppressed, the excitatory cells are more strongly  
499 surround suppressed than the inhibitory cells as we see from the length tuning curves for  
500 6 E cells (Fig. 12 top panel) and 6 I cells (Fig. 12 lower panel), and the average size tuning  
501 across 30 E cells and 30 I cells at the same grid locations (Fig. 13 A,B). The strength of  
502 surround suppression increases with increasing stimulus contrast (Fig. 12 and Fig. 13 A,B).  
503 To compute the suppressive index (SI), we fit the cells responses with a double Gaussian  
504 function. The mean SI is  $0.45 \pm 0.07$  for the excitatory cells and  $0.098 \pm 0.054$  for the  
505 inhibitory cells at  $C=10$ , and increases to  $0.65 \pm 0.09$  and  $0.14 \pm 0.06$  at  $C=100$ .

506 We also show the distribution of the summation field sizes of the 30 E cells selected above  
507 for two contrast levels  $C=100$  and  $C=10$  in Fig. 13C. The summation field size decreases with  
508 increasing contrast (Fig. 13D).

509 To test whether surround suppression in the spiking network is also accompanied by a  
510 decrease in excitation and inhibition, as reported by Ozeki et al. (2009), we plot the excitatory  
511 conductance values (Fig. 14A) and the inhibitory conductance values (Fig. 14B) for the same  
512 30 E cells for a large stimulus for which all the cells are suppressed against their values for  
513 a small stimulus around which the cells respond maximally (we pick the size of the small  
514 stimulus using the same method described in Result 1). Both excitatory and inhibitory

515 conductances are smaller for the large suppressive stimulus.

516 The results for feature-specific surround suppression are qualitatively similar to what we  
 517 observe in the rate model, Fig. 15B is the same as Fig. 9A,B. For surround tuning to the  
 518 center orientation, even though we can see a trend in some cells similar to that we observe in  
 519 the rate model, overall the phenomenon is weak for the center stimulus orientations that give  
 520 a response above the spontaneous activity level, Fig. 15A shows the surround modulation  
 521 map in the spiking model. We point out that we do not optimize the model parameters, so a  
 522 different set of values of the connectivity profile parameters, such as the width of connectivity  
 523 in orientation space and the length of connections, may lead to better results as we have  
 524 observed in a few simulations. Also, the conductances values are not fine tuned, so a different  
 525 set of values can for example give larger SI indexes while still producing result 3.

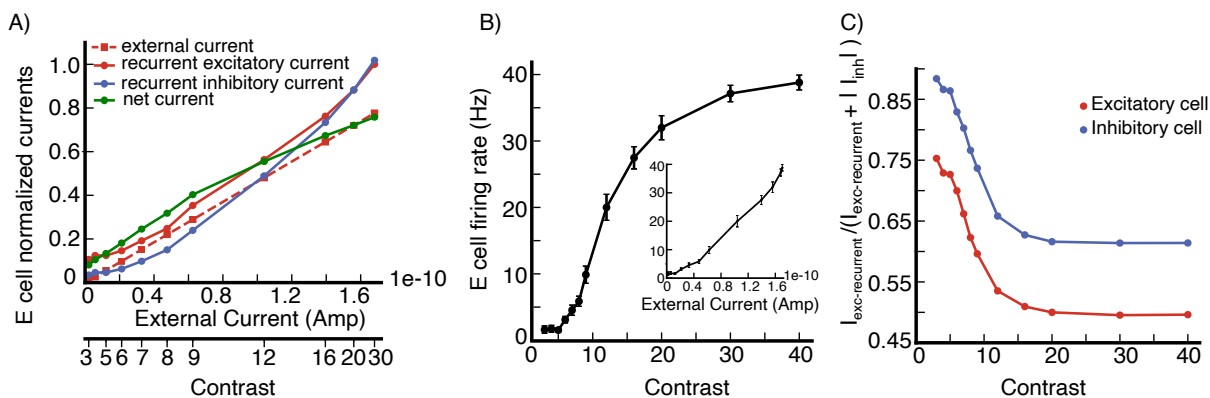

**Figure 11: Conductance-based spiking model** (A) Input currents to an excitatory (E) cell at a randomly selected grid location (see section Model Details) vs external input current. The recurrent excitatory current  $I_{exc-recurrent} = \langle g_E(R_E - V) \rangle_t$ , the recurrent inhibitory current is the absolute value of  $I_{inh} = \langle g_I(R_I - V) \rangle_t$  and the external current  $I_{ext} = \langle g_{in}(R_E - V) \rangle_t$  where  $\langle \rangle_t$  denotes time average. The net current is  $(I_{ext} + I_{exc-recurrent} + I_{inh})$ , note that  $I_{inh}$  is negative in the spiking model. All currents are normalized to the peak value of the recurrent excitatory current. Stimulus contrast level corresponding to the external current is shown on the bottom axis. (B) Firing rate of the cell in (A) vs contrast. (C)  $I_{exc-recurrent} / (I_{exc-recurrent} + |I_{inh}|)$  vs contrast for the cell in (A) and an inhibitory cell at the same grid location. In these experiments we use a stimulus with diameter  $2.16^\circ$  and orientation equal to the cell's preferred orientation.

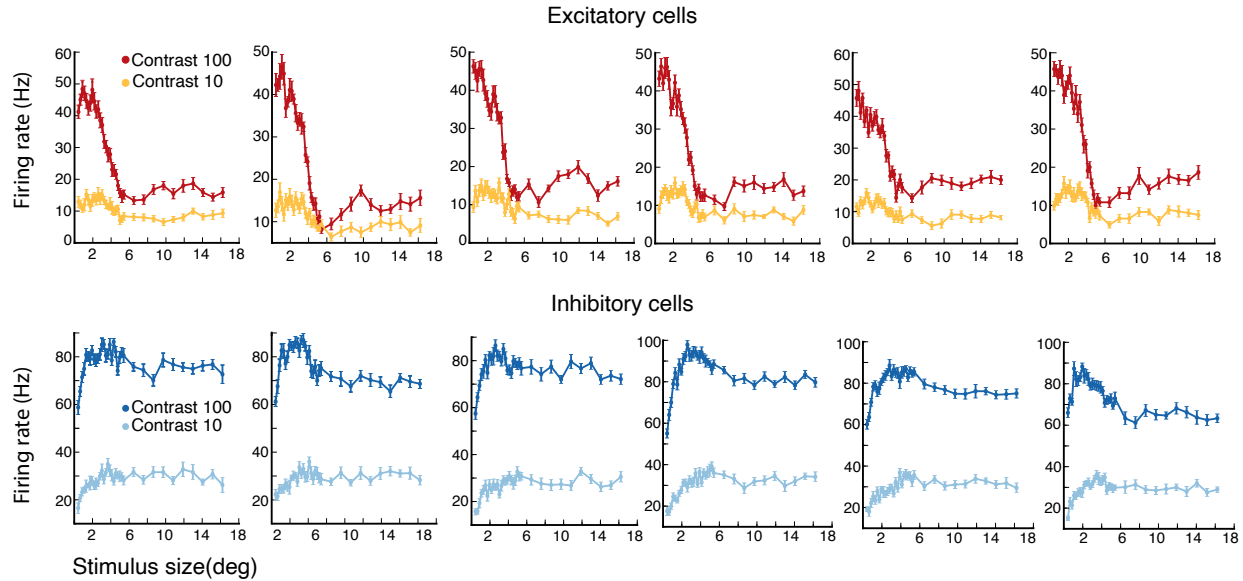

**Figure 12: Conductance-based spiking model, surround suppression** Length tuning curves of 6 excitatory (E) cells (top panel) and 6 inhibitory (I) cells (lower panel) for two different stimulus contrast levels  $C=100$  and  $C=10$ . The error bars are the s.e.m.

## 526 Discussion

527 In previous work (Ahmadian et al., 2013; Rubin et al., 2015) we showed that the stabilized  
528 supralinear network motif (SSN) can explain normalization and surround suppression if  
529 combined with simple connectivity profiles, in which connection strength decreases with  
530 increasing distance across cortex or between preferred features. In Rubin et al. (2015) we  
531 presented a 2-d SSN model of V1 as a proof of principle and showed that the model can  
532 generate surround suppression. Ozeki et al. (2009) found that an iso-oriented surround  
533 stimulus reduces the values of both excitatory and inhibitory conductances of surround  
534 suppressed cells in cat V1. We have found that, unlike in the simpler models studied in  
535 Rubin et al. (2015), the 2-d model did not show this phenomena.

536 In this paper we built a rate-based model of layer 2/3 of V1 of animals with orientation  
537 maps and showed that lateral connections are capable of generating consistently a set of  
538 phenomena that have been observed in V1, including surround suppression, surround tuning  
539 to the center orientation and feature-specific suppression. We also showed that surround

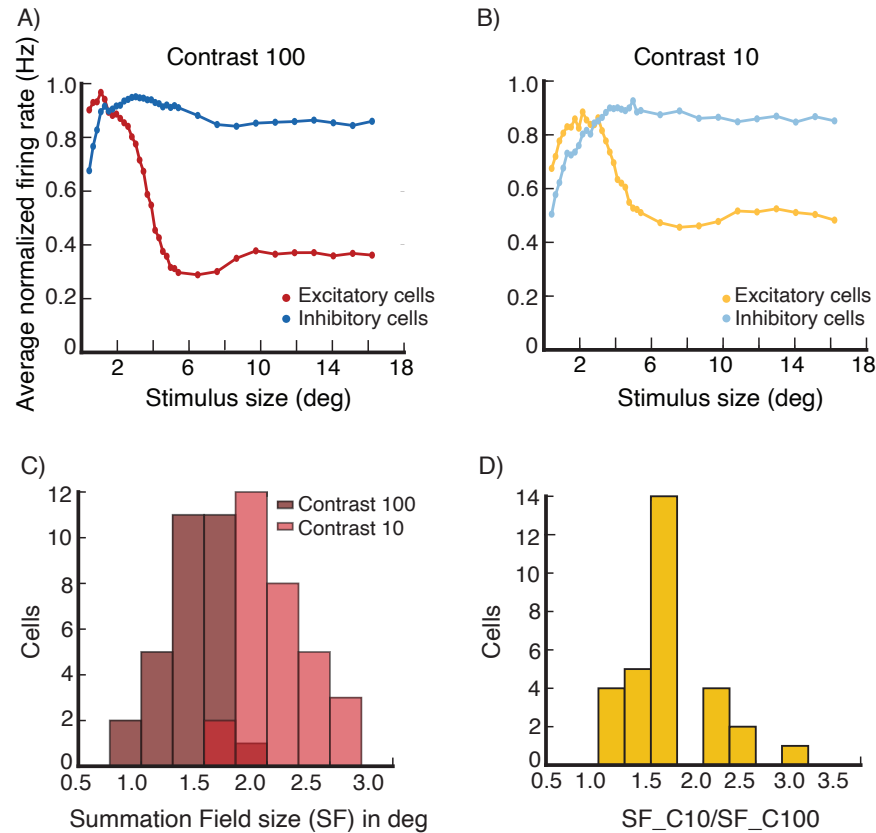

**Figure 13: Conductance-based spiking model, surround suppression** The average firing rate of 30 excitatory (E) cells at randomly selected grid locations (see section Model Details), and of 30 inhibitory (I) cells at the same grid locations, after normalizing each cell's rates so that its peak rate is 1.0, vs. stimulus size at contrast  $C=100$  (A) and contrast  $C=10$  (B). (C,D) Summation Field Sizes. (C) The distribution of summation field size of the 30 E cells used to produce panels (A) and (B) at contrasts  $C=100$  (dark red color) and  $C=10$  (light red color). (D) The distribution of the ratio of the summation field sizes in (C). The summation field size of all cells, is smaller at the higher contrast stimulus.

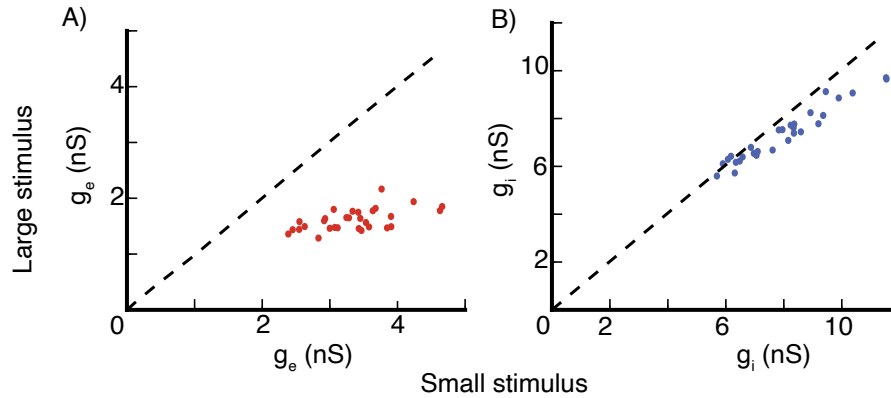

**Figure 14: Conductance-based spiking model, surround suppression** Excitatory and inhibitory conductances values of the 30 excitatory (E) cells used in Fig. 13. (A) Excitatory conductance values of the E cells for a large suppressive stimulus are plotted against their values for a small stimulus size around which the cells respond maximally. (B) same as (A) but for inhibitory conductances. Stimulus contrast  $C=100$ .

540 suppression is accompanied by a decrease in the excitatory and inhibitory inputs. As far as  
541 we know, this is the only spatially extended model of V1 that has shown this phenomena.  
542 The activity decay time constant for the excitatory cells in the model is fast, about the same  
543 as the single-cell time constant, as in Reinhold et al. (2015). Finally, we showed that our  
544 key results hold in a conductance-based spiking network.

545 The model gives insight into the circuit mechanisms that may underly the above observed  
546 phenomena. The network is a stabilized supralinear network, it has specific connectivity high-  
547 lighted by dense, strong local excitatory connections that are broadly tuned in orientation  
548 space, and long range patchy excitatory connections that are biased toward inhibitory cells  
549 at longer distances. The network is in a strongly nonlinear regime quantified by  $\Omega_E < 0 < \Omega_I$   
550 (Ahmadian et al., 2013). The requirement that the local connectivity be broadly tuned in  
551 orientation space is essential to obtain surround tuning to the center orientation, but not to  
552 obtain surround suppression and feature-specific suppression. We note that the parameters  
553 we used, such as connectivity profile, input profile, and the underlying orientation map, were  
554 chosen without tuning them to any of the phenomena we study.

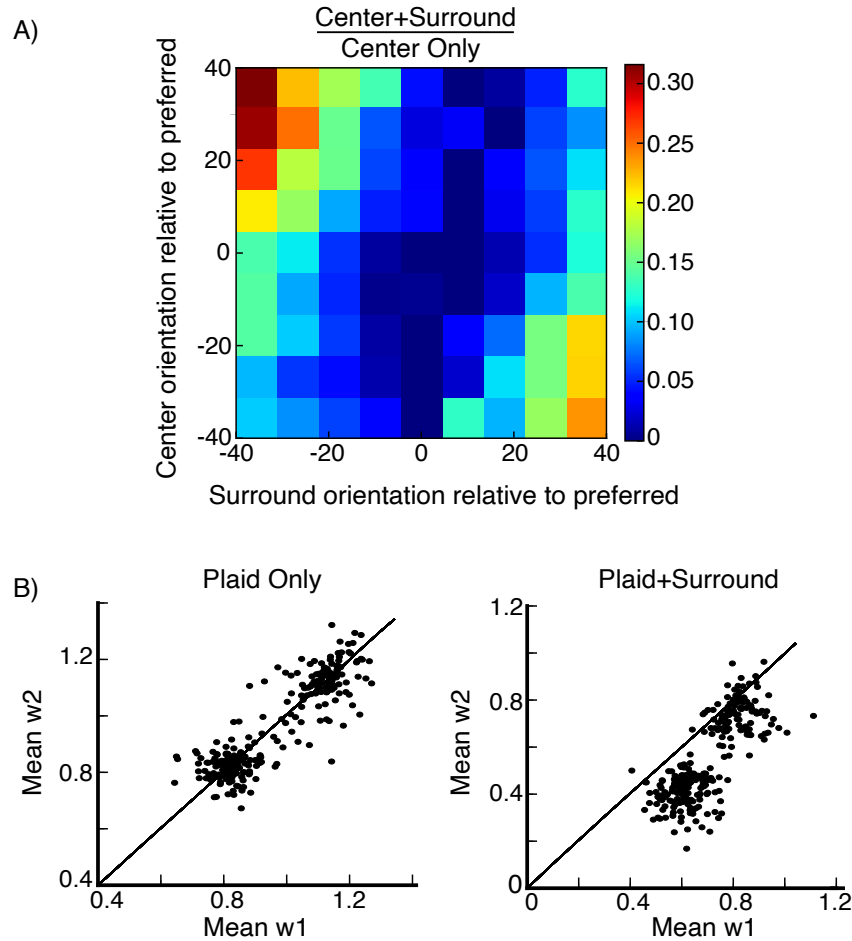

**Figure 15: Conductance-based spiking model, surround tuning to the center orientation and feature-specific surround suppression** (A) Surround tuning to the center orientation, average surround modulation map, the data is from 23 excitatory (E) cells at randomly selected grid locations (see section Model Details), same plot as Fig. 7A. (B) Feature-specific surround suppression, the data is from 56 populations centered around 56 randomly selected grid locations (see section Model Details), same plot as Fig. 9A,B.

## 555 Acknowledgments

556 We acknowledge computing resources from Columbia University's Shared Research Com-  
557 puting Facility project, which is supported by NIH Research Facility Improvement Grant  
558 1G20RR030893-01, and associated funds from the New York State Empire State Develop-  
559 ment, Division of Science Technology and Innovation (NYSTAR) Contract C090171, both  
560 awarded April 15, 2010. This project was supported by NIH grant R01-EY11001, grant  
561 2016-4 from the Swartz Foundation, the Gatsby Charitable Foundation, and NSF NeuroNex



562 Award DBI-1707398. D. Obeid would like to thank Richard Born, Alexander Trott, S.  
563 Shushruth and Cengiz Pehlevan for helpful discussions.

## 564 **References**

- 565 Adesnik, H. (2017). Synaptic mechanisms of feature coding in the visual cortex of awake  
566 mice. *Neuron*, 95(5):1147–1159.
- 567 Ahmadian, Y., Rubin, D. B., and Miller, K. D. (2013). Analysis of the stabilized supralinear  
568 network. *Neural computation*, 25(8):1994–2037.
- 569 Akasaki, T., Sato, H., Yoshimura, Y., Ozeki, H., and Shimegi, S. (2002). Suppressive effects of  
570 receptive field surround on neuronal activity in the cat primary visual cortex. *Neuroscience*  
571 *Research*, 43(3):207–220.
- 572 Albrecht, D. G. and Hamilton, D. B. (1982). Striate cortex of monkey and cat: contrast  
573 response function. *Journal of neurophysiology*, 48(1):217–237.
- 574 Albrecht, G. (1991). Motion selectivity and the contrast-response function of simple cells in  
575 the visual cortex. *Vis Neurosci*, pages 531–546.
- 576 Amir, Y., Harel, M., and Malach, R. (1993). Cortical hierarchy reflected in the organization  
577 of intrinsic connections in macaque monkey visual cortex. *The Journal of Comparative*  
578 *Neurology*, 334(1):19–46.
- 579 Angelucci, A., Bijanzadeh, M., Nurminen, L., Federer, F., Merlin, S., and Bressloff, P. C.  
580 (2017). Circuits and mechanisms for surround modulation in visual cortex. *Annual review*  
581 *of neuroscience*, 40:425–451.
- 582 Bair, W., Cavanaugh, J. R., and Movshon, J. A. (2003). Time course and time-distance  
583 relationships for surround suppression in macaque v1 neurons. *Journal of Neuroscience*,  
584 23(20):7690–7701.

- 585 Bosking, W. H., Zhang, Y., Schofield, B., and Fitzpatrick, D. (1997). Orientation selectivity  
586 and the arrangement of horizontal connections in tree shrew striate cortex. *Journal of*  
587 *neuroscience*, 17(6):2112–2127.
- 588 Carandini, M., Heeger, D., and Movshon, J. A. (1997). Linearity and normalization in simple  
589 cells of the macaque primary visual cortex. *Journal of Neuroscience*, 17:8621–8644.
- 590 Carandini, M., Heeger, D. J., and Movshon, J. A. (1999). Linearity and gain control in v1  
591 simple cells. In *Models of cortical circuits*, pages 401–443. Springer.
- 592 Cavanaugh, J. R., Bair, W., and Movshon, J. A. (2002). Nature and interaction of signals  
593 from the receptive field center and surround in macaque v1 neurons. *Journal of neuro-*  
594 *physiology*, 88(5):2530–2546.
- 595 Chen, Y., Anand, S., Martinez-Conde, S., Macknik, S. L., Bereshpolova, Y., Swadlow, H. A.,  
596 and Alonso, J.-M. (2009). The linearity and selectivity of neuronal responses in awake  
597 visual cortex. *Journal of vision*, 9(9):12–12.
- 598 Finn, I. M., Priebe, N. J., and Ferster, D. (2007). The emergence of contrast-invariant  
599 orientation tuning in simple cells of cat visual cortex. *Neuron*, 54(1):137–152.
- 600 Gur, M. and Snodderly, D. M. (2008). Physiological differences between neurons in layer  
601 2 and layer 3 of primary visual cortex (v1) of alert macaque monkeys. *The Journal of*  
602 *physiology*, 586(9):2293–2306.
- 603 Hansel, D. and Van Vreeswijk, C. (2002). How noise contributes to contrast invariance of  
604 orientation tuning in cat visual cortex. *Journal of Neuroscience*, 22(12):5118–5128.
- 605 Heeger, D. J. (1992). Half-squaring in responses of cat striate cells. *Visual neuroscience*,  
606 9(5):427–443.
- 607 Kaschube, M., Schnabel, M., Löwel, S., Coppola, D. M., White, L. E., and Wolf, F.

- 608 (2010). Universality in the evolution of orientation columns in the visual cortex. *Sci-*  
609 *ence*, 330(6007):1113–1116.
- 610 Miller, K. D. and Troyer, T. W. (2002). Neural noise can explain expansive, power-law  
611 nonlinearities in neural response functions. *Journal of neurophysiology*, 87(2):653–659.
- 612 Ozeki, H., Finn, I. M., Schaffer, E. S., Miller, K. D., and Ferster, D. (2009). Inhibitory stabi-  
613 lization of the cortical network underlies visual surround suppression. *Neuron*, 62(4):578–  
614 592.
- 615 Reinhold, K., Lien, A. D., and Scanziani, M. (2015). Distinct recurrent versus afferent  
616 dynamics in cortical visual processing. *Nature neuroscience*.
- 617 Ringach, D. L., Shapley, R. M., and Hawken, M. J. (2002). Orientation selectivity in macaque  
618 v1: diversity and laminar dependence. *Journal of Neuroscience*, 22(13):5639–5651.
- 619 Rubin, D. B., Van Hooser, S. D., and Miller, K. D. (2015). The stabilized supralinear  
620 network: A unifying circuit motif underlying multi-input integration in sensory cortex.  
621 *Neuron*, 85(2):402–417.
- 622 Sanzeni, A., Histed, M. H., and Brunel, N. (2020a). Emergence of irregular activity in net-  
623 works of strongly coupled conductance-based neurons. *arXiv preprint arXiv:2009.12023*.
- 624 Sanzeni, A., Histed, M. H., and Brunel, N. (2020b). Response nonlinearities in networks of  
625 spiking neurons. *PLoS computational biology*, 16(9):e1008165.
- 626 Sceniak, M. P., Ringach, D. L., Hawken, M. J., and Shapley, R. (1999). Contrast’s effect on  
627 spatial summation by macaque v1 neurons. *Nature neuroscience*, 2(8):733.
- 628 Shen, Z.-M., Xu, W.-F., and Li, C.-Y. (2007). Cue-invariant detection of centre-surround  
629 discontinuity by v1 neurons in awake macaque monkey. *The Journal of physiology*,  
630 583(2):581–592.

- 631 Shushruth, S., Mangapathy, P., Ichida, J. M., Bressloff, P. C., Schwabe, L., and Angelucci, A.  
632 (2012). Strong recurrent networks compute the orientation tuning of surround modulation  
633 in the primate primary visual cortex. *The Journal of Neuroscience*, 32(1):308–321.
- 634 Sillito, A. M., Grieve, K. L., Jones, H. E., Cudeiro, J., and Davis, J. (1995). Visual cortical  
635 mechanisms detecting focal orientation discontinuities. *Nature*, 378(6556):492–496.
- 636 Stettler, D. D., Das, A., Bennett, J., and Gilbert, C. D. (2002). Lateral connectivity and  
637 contextual interactions in macaque primary visual cortex. *Neuron*, 36(4):739–750.
- 638 Trott, A. R. and Born, R. T. (2015). Input-gain control produces feature-specific surround  
639 suppression. *The Journal of Neuroscience*, 35(12):4973–4982.
- 640 Troyer, T. W. and Miller, K. D. (1997). Physiological gain leads to high isi variability in a  
641 simple model of a cortical regular spiking cell. *Neural Computation*, 9(5):971–983.
- 642 Tsodyks, M. V., Skaggs, W. E., and Sejnowski, T. J. and McNaughton, B. L. (1997). Paradox-  
643 ical effects of external modulation of inhibitory interneurons. *J. Neurosci.*, 17:4382–4388.
- 644 Tuckwell, H. (1988). *Introduction to Theoretical Neurobiology: Volume 2, Nonlinear and*  
645 *Stochastic theories*. Cambridge University Press.
- 646 Wang, C., Bardy, C., Huang, J. Y., FitzGibbon, T., and Dreher, B. (2009). Contrast  
647 dependence of center and surround integration in primary visual cortex of the cat. *Journal*  
648 *of vision*, 9(1):20–20.
